# Supplementary material for: NAD-Driven Sirtuin Activation by Cordyceps sinensis Extract: Exploring the Adaptogenic Potential to Promote Skin Longevity
Source: MDPI journal article supplement (doi:10.3390/ijms25084282), 2024-04-12
Supplement: s1 [file s1]

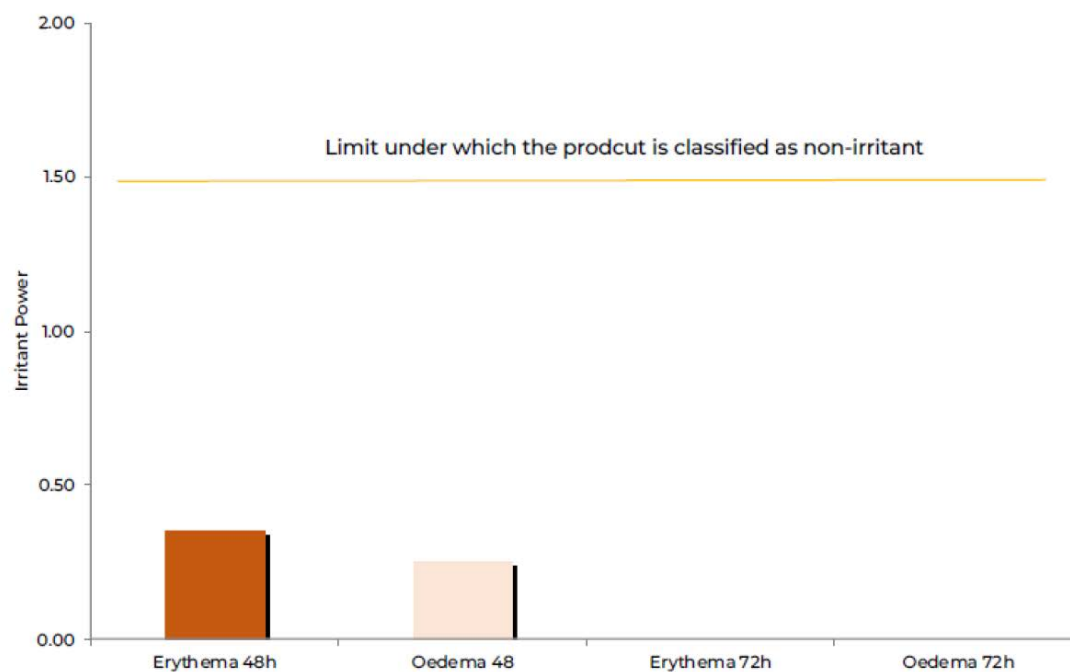

**Figure S1.** Value of the average irritation index.

**Table S1.** Value of edema and/or erythema detected after 48 and 72 hours by occlusive CsEx-containing patch application.

| #           | Panelist ID | Sex | Erythema<br>48h | Oedema<br>48 | Erythema<br>72h | Oedema<br>72h |       |
|-------------|-------------|-----|-----------------|--------------|-----------------|---------------|-------|
| 1           | IN97        | F   | 1               | 0            | 0               | 0             |       |
| 2           | LR95        | F   | 0               | 0            | 0               | 0             |       |
| 3           | CF98        | F   | 0               | 0            | 0               | 0             |       |
| 4           | RDL92       | F   | 0               | 0            | 0               | 0             |       |
| 5           | EV79        | F   | 0               | 0            | 0               | 0             |       |
| 6           | SL68        | F   | 2               | 0            | 0               | 0             |       |
| 7           | AM68        | F   | 1               | 0            | 0               | 0             |       |
| 8           | IC99        | F   | 0               | 1            | 0               | 0             |       |
| 9           | IN77        | F   | 1               | 2            | 0               | 0             |       |
| 10          | VN76        | F   | 0               | 0            | 0               | 0             |       |
| 11          | CS98        | F   | 0               | 0            | 0               | 0             |       |
| 12          | FS77        | F   | 1               |              | 0               | 0             |       |
| 13          | EV00        | F   | 0               | 0            | 0               | 0             |       |
| 14          | AD66        | F   | 0               | 1            | 0               | 0             |       |
| 15          | PR71        | F   | 0               | 0            | 0               | 0             |       |
| 16          | RB76        | F   | 0               | 0            | 0               | 0             |       |
| 17          | GS88        | F   | 0               | 1            | 0               | 0             |       |
| 18          | MDC76       | F   | 1               | 0            | 0               | 0             |       |
| 19          | RC99        | F   | 0               | 0            | 0               | 0             |       |
| 20          | LC00        | F   | 0               | 0            | 0               | 0             |       |
| MEAN VALUES |             |     | 0.350           | 0.250        | 0.000           | 0.000         | 0.000 |
| SD          |             |     | 0.587           | 0.562        | 0.000           | 0.000         |       |
| MEAN + SD   |             |     | 0.937           | 0.812        | 0.000           | 0.000         | 0.000 |
|             |             |     | E-PI48          | O-PI48       | E-PI72          | O-PI72        | PIM   |

**Table S2.** Effect of the *C. sinensis* extract (CsEx) on skin energy boosting of treated volunteers after a) 7 b)14 and c) 28 days of treatment. Skin energy value for each volunteer and their variation are reported, along with average percentage variation value  $\pm$  SD.

a)

| SKIN ENERGY D0 - D7<br>CsEx |           |     |                 |                   |
|-----------------------------|-----------|-----|-----------------|-------------------|
| #Volunteer                  | D0        | D7  | $\Delta(D7-D0)$ | $\Delta(D7-D0)\%$ |
| 1                           | 3.7       | 2.9 | -0.8            | -21.6             |
| 2                           | 4.2       | 4.6 | 0.4             | 9.1               |
| 3                           | 3.5       | 4.4 | 0.9             | 26.8              |
| 4                           | 3.7       | 3.4 | -0.3            | -8.4              |
| 5                           | 3.5       | 4.0 | 0.5             | 14.1              |
| 6                           | 3.5       | 3.3 | -0.2            | -4.3              |
| 7                           | 3.8       | 3.8 | 0.0             | 0.0               |
| 8                           | 3.7       | 3.8 | 0.1             | 3.0               |
| 9                           | 3.8       | 4.0 | 0.2             | 5.3               |
| 10                          | 3.4       | 3.7 | 0.3             | 7.4               |
| 11                          | 3.6       | 4.7 | 1.1             | 30.6              |
| 12                          | 3.6       | 4.6 | 1.0             | 27.8              |
| 13                          | 3.6       | 4.6 | 1.0             | 27.8              |
| 14                          | 3.8       | 4.1 | 0.3             | 7.9               |
| 15                          | 3.5       | 5.0 | 1.5             | 42.9              |
| 16                          | 3.3       | 4.0 | 0.7             | 21.2              |
| 17                          | 3.5       | 4.9 | 1.5             | 42.0              |
| 18                          | 3.8       | 5.1 | 1.3             | 34.2              |
| 19                          | 4.0       | 5.3 | 1.3             | 32.5              |
| 20                          | 3.4       | 4.8 | 1.4             | 41.2              |
| Average                     | 3.6       | 4.2 | 0.6             | 17.0              |
| Std. Dev                    | 0.2       | 0.7 | 0.7             | 18.4              |
| N. Volunteers               | 20        | 20  | 20              |                   |
| t-test                      | 3.9382494 |     |                 |                   |
| Degrees of Freedom          | 38        |     |                 |                   |
| p                           | 0.000339  |     |                 |                   |

b)

| SKIN ENERGY D0 - D14<br>CsEx |            |      |                  |                    |
|------------------------------|------------|------|------------------|--------------------|
| #Volunteer                   | D0         | D14  | $\Delta(D14-D0)$ | $\Delta(D14-D0)\%$ |
| 1                            | 3.7        | 4.2  | 0.5              | 12.9               |
| 2                            | 4.2        | 5.2  | 1.0              | 22.9               |
| 3                            | 3.5        | 4.6  | 1.2              | 33.6               |
| 4                            | 3.7        | 5.0  | 1.3              | 34.8               |
| 5                            | 3.5        | 5.4  | 1.9              | 55.7               |
| 6                            | 3.5        | 3.7  | 0.2              | 6.3                |
| 7                            | 3.8        | 4.2  | 0.4              | 10.5               |
| 8                            | 3.7        | 4.1  | 0.4              | 10.8               |
| 9                            | 3.8        | 4.7  | 0.9              | 24.5               |
| 10                           | 3.4        | 3.8  | 0.4              | 12.1               |
| 11                           | 3.6        | 3.8  | 0.2              | 5.8                |
| 12                           | 3.6        | 4.2  | 0.6              | 16.1               |
| 13                           | 3.6        | 4.6  | 1.0              | 27.8               |
| 14                           | 3.8        | 5.0  | 1.2              | 31.6               |
| 15                           | 3.5        | 4.70 | 1.2              | 34.3               |
| 16                           | 3.3        | 4.45 | 1.2              | 34.8               |
| 17                           | 3.5        | 4.90 | 1.5              | 42.0               |
| 18                           | 3.8        | 5.10 | 1.3              | 34.2               |
| 19                           | 4.0        | 4.70 | 0.7              | 17.5               |
| 20                           | 3.4        | 4.80 | 1.4              | 41.2               |
| Average                      | 3.6        | 4.6  | 0.9              | 25.5               |
| Std. Dev                     | 0.2        | 0.5  | 0.5              | 13.7               |
| N. Volunteers                | 20         | 20   | 20               |                    |
| t-test                       | 7.60991843 |      |                  |                    |
| Degrees of Freedom           | 38         |      |                  |                    |
| p                            | 3.7349E-09 |      |                  |                    |

c)

| SKIN ENERGY D0 - D28<br>CsEx |           |     |                  |                    |
|------------------------------|-----------|-----|------------------|--------------------|
| #Volunteer                   | D0        | D28 | $\Delta(D28-D0)$ | $\Delta(D28-D0)\%$ |
| 1                            | 3.7       | 5.1 | 1.4              | 37.8               |
| 2                            | 4.2       | 5.2 | 0.9              | 22.0               |
| 3                            | 3.5       | 6.3 | 2.8              | 81.6               |
| 4                            | 3.7       | 5.3 | 1.6              | 42.9               |
| 5                            | 3.5       | 5.5 | 2.0              | 58.0               |
| 6                            | 3.5       | 4.5 | 1.0              | 29.0               |
| 7                            | 3.8       | 6.8 | 3.0              | 78.9               |
| 8                            | 3.7       | 5.1 | 1.4              | 38.1               |
| 9                            | 3.8       | 4.5 | 0.7              | 18.4               |
| 10                           | 3.4       | 7.4 | 4.0              | 118.5              |
| 11                           | 3.6       | 5.2 | 1.6              | 43.8               |
| 12                           | 3.6       | 6.3 | 2.7              | 75.0               |
| 13                           | 3.6       | 4.6 | 1.0              | 27.8               |
| 14                           | 3.8       | 6.0 | 2.2              | 57.9               |
| 15                           | 3.5       | 5.3 | 1.8              | 51.4               |
| 16                           | 3.3       | 5.0 | 1.7              | 51.5               |
| 17                           | 3.5       | 4.3 | 0.9              | 24.6               |
| 18                           | 3.8       | 5.0 | 1.2              | 31.6               |
| 19                           | 4.0       | 4.9 | 0.9              | 22.5               |
| 20                           | 3.4       | 5.2 | 1.8              | 52.9               |
| Average                      | 3.6       | 5.4 | 1.7              | 52.0               |
| Std. Dev                     | 0.2       | 0.8 | 0.9              | 25.2               |
| N. Volunteers                | 20        | 20  | 20               |                    |
| t-test                       | 9.2186724 |     |                  |                    |
| Degrees of Freedom           | 38        |     |                  |                    |
| p                            | 3.115E-11 |     |                  |                    |

**Table S3.** Skin energy on volunteers treated with placebo after a) 7, b) 14, and c) 28 days of treatment. Skin energy value for each volunteer and their variation are reported, along with average percentage variation value  $\pm$  SD.

a)

| SKIN ENERGY D0 - D7 |           |      |          |           |
|---------------------|-----------|------|----------|-----------|
| Placebo             |           |      |          |           |
| #Volunteer          | D0        | D7   | Δ(D7-D0) | Δ(D7-D0)% |
| 1                   | 3.3       | 4.9  | 1.6      | 47.9      |
| 2                   | 3.7       | 5.7  | 2.0      | 53.8      |
| 3                   | 3.6       | 3.8  | 0.2      | 5.6       |
| 4                   | 3.4       | 3.5  | 0.1      | 4.1       |
| 5                   | 3.8       | 3.4  | -0.4     | -9.5      |
| 6                   | 3.5       | 3.4  | -0.1     | -2.6      |
| 7                   | 3.4       | 3.5  | 0.1      | 2.9       |
| 8                   | 3.8       | 3.9  | 0.2      | 4.0       |
| 9                   | 3.6       | 3.9  | 0.3      | 8.9       |
| 10                  | 4.0       | 3.5  | -0.5     | -12.6     |
| 11                  | 3.8       | 3.9  | 0.1      | 3.4       |
| 12                  | 3.6       | 3.5  | -0.1     | -2.8      |
| 13                  | 3.7       | 3.2  | -0.5     | -13.5     |
| 14                  | 4.0       | 4.0  | 0.0      | 0.0       |
| 15                  | 3.5       | 3.45 | 0.0      | -1.4      |
| 16                  | 3.9       | 3.50 | -0.4     | -10.3     |
| 17                  | 4.0       | 3.8  | -0.2     | -5.0      |
| 18                  | 3.6       | 3.7  | 0.1      | 2.8       |
| 19                  | 3.5       | 3.4  | -0.1     | -2.9      |
| 20                  | 3.7       | 3.2  | -0.5     | -13.5     |
| Average             | 3.7       | 3.8  | 0.1      | 3.0       |
| Std. Dev            | 0.2       | 0.6  | 0.6      | 17.7      |
| N. Volunteers       | 20        | 20   | 20       |           |
| t-test              | 0.6872457 |      |          |           |
| Degrees of Freedom  | 38        |      |          |           |
| p                   | 0.4961012 |      |          |           |

b)

| SKIN ENERGY D0 - D14 |            |      |           |            |
|----------------------|------------|------|-----------|------------|
| Placebo              |            |      |           |            |
| #Volunteer           | D0         | D14  | Δ(D14-D0) | Δ(D14-D0)% |
| 1                    | 3.3        | 4.0  | 0.7       | 21.2       |
| 2                    | 3.7        | 4.2  | 0.5       | 14.1       |
| 3                    | 3.6        | 4.4  | 0.8       | 20.8       |
| 4                    | 3.4        | 4.5  | 1.1       | 32.4       |
| 5                    | 3.8        | 5.0  | 1.2       | 30.3       |
| 6                    | 3.5        | 4.2  | 0.7       | 20.0       |
| 7                    | 3.4        | 3.8  | 0.4       | 11.8       |
| 8                    | 3.8        | 4.4  | 0.6       | 15.8       |
| 9                    | 3.6        | 4.8  | 1.2       | 33.1       |
| 10                   | 4.0        | 4.8  | 0.8       | 19.0       |
| 11                   | 3.8        | 3.5  | -0.3      | -6.8       |
| 12                   | 3.6        | 3.4  | -0.2      | -5.6       |
| 13                   | 3.7        | 3.6  | -0.1      | -2.7       |
| 14                   | 4.0        | 4.8  | 0.8       | 20.9       |
| 15                   | 3.5        | 4.00 | 0.5       | 14.3       |
| 16                   | 3.9        | 4.40 | 0.5       | 12.8       |
| 17                   | 4.0        | 5.00 | 1.0       | 25.0       |
| 18                   | 3.6        | 4.20 | 0.6       | 16.7       |
| 19                   | 3.5        | 4.00 | 0.5       | 14.3       |
| 20                   | 3.7        | 4.90 | 1.2       | 32.4       |
| Average              | 3.7        | 4.3  | 0.6       | 17.0       |
| Std. Dev             | 0.2        | 0.5  | 0.4       | 11.6       |
| N. Volunteers        | 20         | 20   | 20        |            |
| t-test               | 5.26063449 |      |           |            |
| Degrees of Freedom   | 38         |      |           |            |
| p                    | 5.8664E-06 |      |           |            |

c)

| SKIN ENERGY D0 - D28 |           |      |           |            |
|----------------------|-----------|------|-----------|------------|
| Placebo              |           |      |           |            |
| #Volunteer           | D0        | D28  | Δ(D28-D0) | Δ(D28-D0)% |
| 1                    | 3.3       | 4.0  | 0.7       | 21.2       |
| 2                    | 3.7       | 6.5  | 2.8       | 75.1       |
| 3                    | 3.6       | 4.0  | 0.4       | 11.1       |
| 4                    | 3.4       | 5.5  | 2.1       | 60.9       |
| 5                    | 3.8       | 3.9  | 0.1       | 3.7        |
| 6                    | 3.5       | 4.2  | 0.7       | 20.0       |
| 7                    | 3.4       | 4.1  | 0.7       | 20.6       |
| 8                    | 3.8       | 5.0  | 1.2       | 31.1       |
| 9                    | 3.6       | 4.7  | 1.1       | 30.0       |
| 10                   | 4.0       | 3.3  | -0.7      | -18.0      |
| 11                   | 3.8       | 3.5  | -0.3      | -6.8       |
| 12                   | 3.6       | 3.6  | 0.0       | 0.0        |
| 13                   | 3.7       | 3.6  | -0.1      | -2.7       |
| 14                   | 4.0       | 4.8  | 0.8       | 20.9       |
| 15                   | 3.5       | 4.50 | 1.0       | 28.6       |
| 16                   | 3.9       | 4.20 | 0.3       | 7.7        |
| 17                   | 4.0       | 4.50 | 0.5       | 12.5       |
| 18                   | 3.6       | 4.80 | 1.2       | 33.3       |
| 19                   | 3.5       | 4.00 | 0.5       | 14.3       |
| 20                   | 3.7       | 3.00 | -0.7      | -18.9      |
| Average              | 3.7       | 4.3  | 0.6       | 19.0       |
| Std. Dev             | 0.2       | 0.8  | 0.8       | 23.2       |
| N. Volunteers        | 20        | 20   | 20        |            |
| t-test               | 3.3381377 |      |           |            |
| Degrees of Freedom   | 38        |      |           |            |
| p                    | 0.0018968 |      |           |            |

**Table S4.** Effect of the *C. sinensis* extract (CsEx) on collagen production in treated volunteers after a) 7 b)14 and c) 28 days of treatment. Collagen Index value for each volunteer and their variation are reported, along with average percentage variation value  $\pm$  SD.

| a) <b>COLLAGEN INDEX D0 - D7</b><br>CsEx |           |       |                 |                   |
|------------------------------------------|-----------|-------|-----------------|-------------------|
| #Volunteer                               | D0        | D7    | $\Delta(D7-D0)$ | $\Delta(D7-D0)\%$ |
| 1                                        | 45.4      | 46.0  | 0.6             | 1.3               |
| 2                                        | 42.1      | 43.1  | 1.0             | 2.4               |
| 3                                        | 40.4      | 36.6  | -3.8            | -9.3              |
| 4                                        | 41.7      | 44.6  | 2.9             | 7.0               |
| 5                                        | 39.7      | 43.1  | 3.4             | 8.6               |
| 6                                        | 40.1      | 42.8  | 2.7             | 6.7               |
| 7                                        | 38.6      | 38.6  | 0.0             | 0.0               |
| 8                                        | 41.7      | 44.7  | 3.0             | 7.2               |
| 9                                        | 41.9      | 38.9  | -3.0            | -7.2              |
| 10                                       | 41.0      | 38.0  | -3.0            | -7.4              |
| 11                                       | 46.1      | 43.1  | -3.1            | -6.6              |
| 12                                       | 45.7      | 44.6  | -1.2            | -2.5              |
| 13                                       | 39.3      | 39.9  | 0.6             | 1.5               |
| 14                                       | 40.9      | 42.2  | 1.3             | 3.1               |
| 15                                       | 39.7      | 43.00 | 3.3             | 8.3               |
| 16                                       | 40.3      | 42.20 | 1.9             | 4.7               |
| 17                                       | 40.4      | 42.90 | 2.5             | 6.2               |
| 18                                       | 39.5      | 41.60 | 2.1             | 5.3               |
| 19                                       | 39.2      | 41.90 | 2.7             | 6.9               |
| 20                                       | 42.0      | 39.60 | -2.4            | -5.7              |
| <b>Average</b>                           | 41.3      | 41.9  | 0.6             | 1.5               |
| <b>Std. Dev</b>                          | 2.2       | 2.5   |                 |                   |
| N. Volunteers                            | 20        | 20    | 20              |                   |
| <b>t-test</b>                            | 0.7821607 |       |                 |                   |
| Degrees of Freedom                       | 38        |       |                 |                   |
| <b>p</b>                                 | 0.438967  |       |                 |                   |

| b) <b>COLLAGEN INDEX D0 - D14</b><br>CsEx |           |      |                  |                    |
|-------------------------------------------|-----------|------|------------------|--------------------|
| #Volunteer                                | D0        | D14  | $\Delta(D14-D0)$ | $\Delta(D14-D0)\%$ |
| 1                                         | 45.4      | 46.3 | 0.9              | 1.9                |
| 2                                         | 42.1      | 43.4 | 1.3              | 3.1                |
| 3                                         | 40.4      | 45.7 | 5.3              | 13.1               |
| 4                                         | 41.7      | 42.9 | 1.2              | 2.9                |
| 5                                         | 39.7      | 45.4 | 5.7              | 14.2               |
| 6                                         | 40.1      | 44.9 | 4.8              | 12.1               |
| 7                                         | 38.6      | 39.7 | 1.1              | 2.8                |
| 8                                         | 41.7      | 52.0 | 10.3             | 24.7               |
| 9                                         | 41.9      | 46.0 | 4.1              | 9.8                |
| 10                                        | 41.0      | 41.2 | 0.2              | 0.6                |
| 11                                        | 46.1      | 49.0 | 2.9              | 6.2                |
| 12                                        | 45.7      | 53.6 | 7.9              | 17.2               |
| 13                                        | 36.3      | 36.7 | 0.4              | 1.1                |
| 14                                        | 40.9      | 38.9 | -2.0             | -5.0               |
| 15                                        | 39.7      | 44.8 | 5.1              | 12.8               |
| 16                                        | 40.3      | 47.6 | 7.3              | 18.1               |
| 17                                        | 40.4      | 46.9 | 6.5              | 16.1               |
| 18                                        | 39.5      | 46.8 | 7.3              | 18.5               |
| 19                                        | 39.2      | 45.1 | 5.9              | 15.1               |
| 20                                        | 42.0      | 48.0 | 6.0              | 14.3               |
| <b>Average</b>                            | 41.1      | 45.2 | 4.1              | 10.0               |
| <b>Std. Dev</b>                           | 2.4       | 4.1  | 3.2              | 7.8                |
| N. Volunteers                             | 20        | 20   | 20               |                    |
| <b>t-test</b>                             | 3.8645388 |      |                  |                    |
| Degrees of Freedom                        | 38        |      |                  |                    |
| <b>p</b>                                  | 0.0004212 |      |                  |                    |

c)

| COLLAGEN INDEX D0 - D28<br>CsEx |           |      |                  |                    |
|---------------------------------|-----------|------|------------------|--------------------|
| #Volunteer                      | D0        | D28  | $\Delta(D28-D0)$ | $\Delta(D28-D0)\%$ |
| 1                               | 45.4      | 41.3 | -4.1             | -9.1               |
| 2                               | 42.1      | 31.4 | -10.7            | -25.4              |
| 3                               | 40.4      | 47.1 | 6.7              | 16.6               |
| 4                               | 41.7      | 46.1 | 4.4              | 10.6               |
| 5                               | 39.7      | 44.1 | 4.4              | 11.1               |
| 6                               | 40.1      | 48.0 | 7.9              | 19.6               |
| 7                               | 38.6      | 39.1 | 0.5              | 1.3                |
| 8                               | 41.7      | 43.3 | 1.6              | 3.8                |
| 9                               | 41.9      | 43.0 | 1.1              | 2.7                |
| 10                              | 41.0      | 48.6 | 7.6              | 18.6               |
| 11                              | 46.1      | 48.5 | 2.4              | 5.2                |
| 12                              | 45.7      | 54.9 | 9.2              | 20.1               |
| 13                              | 36.3      | 40.5 | 4.2              | 11.6               |
| 14                              | 40.9      | 40.1 | -0.8             | -1.9               |
| 15                              | 39.7      | 52.0 | 12.3             | 31.0               |
| 16                              | 40.3      | 50.1 | 9.8              | 24.3               |
| 17                              | 40.4      | 46.2 | 5.8              | 14.3               |
| 18                              | 39.5      | 48.2 | 8.7              | 21.9               |
| 19                              | 39.2      | 46.2 | 7.0              | 17.9               |
| 20                              | 42.0      | 49.0 | 7.0              | 16.7               |
| <b>Average</b>                  | 41.1      | 45.4 | 4.2              | <b>10.5</b>        |
| <b>Std. Dev</b>                 | 2.4       | 5.2  | 5.3              | 12.9               |
| N. Volunteers                   | 20        | 20   | 20               |                    |
| <b><i>t-test</i></b>            | 3.2871185 |      |                  |                    |
| <i>Degrees of Freedom</i>       | 38        |      |                  |                    |
| <b><i>p</i></b>                 | 0.0021843 |      |                  |                    |

**Table S5.** Collagen production on volunteers treated with placebo after a) 7, b) 14, and c) 28 days of treatment. Collagen index value for each volunteer and their variation are reported, along with average percentage variation value  $\pm$  SD.

a)

| COLLAGEN INDEX D0 - D7<br>Placebo |           |       |                 |                   |
|-----------------------------------|-----------|-------|-----------------|-------------------|
| #Volunteer                        | D0        | D7    | $\Delta(D7-D0)$ | $\Delta(D7-D0)\%$ |
| 1                                 | 37.7      | 41.8  | 4.1             | 10.9              |
| 2                                 | 36.9      | 30.1  | -6.8            | -18.5             |
| 3                                 | 40.3      | 40.9  | 0.6             | 1.5               |
| 4                                 | 44.3      | 45.70 | 1.4             | 3.2               |
| 5                                 | 39.5      | 47.0  | 7.5             | 19.0              |
| 6                                 | 37.0      | 25.6  | -11.4           | -30.8             |
| 7                                 | 41.6      | 30.8  | -10.8           | -26.0             |
| 8                                 | 31.4      | 32.9  | 1.5             | 4.8               |
| 9                                 | 32.2      | 27.3  | -4.9            | -15.2             |
| 10                                | 40.6      | 35.5  | -5.1            | -12.6             |
| 11                                | 43.0      | 42.3  | -0.7            | -1.6              |
| 12                                | 40.7      | 35.6  | -5.1            | -12.5             |
| 13                                | 41.3      | 48.3  | 7.0             | 16.9              |
| 14                                | 47.2      | 47.8  | 0.6             | 1.3               |
| 15                                | 39.7      | 39.90 | 0.2             | 0.5               |
| 16                                | 41.2      | 41.40 | 0.2             | 0.5               |
| 17                                | 40.0      | 41.50 | 1.5             | 3.8               |
| 18                                | 41.9      | 38.50 | -3.4            | -8.1              |
| 19                                | 42.6      | 43.60 | 1.0             | 2.3               |
| 20                                | 43.0      | 43.00 | 0.0             | 0.0               |
| <b>Average</b>                    | 40.1      | 39.0  | -1.1            | -3.0              |
| <b>Std. Dev</b>                   | 3.7       | 6.8   |                 |                   |
| N. Volunteers                     | 20        | 20    | 20              |                   |
| <b>t-test</b>                     | 0.6550035 |       |                 |                   |
| Degrees of Freedom                | 38        |       |                 |                   |
| <b>p</b>                          | 0.5164112 |       |                 |                   |

b)

| COLLAGEN INDEX D0 - D14<br>Placebo |           |      |                  |                    |
|------------------------------------|-----------|------|------------------|--------------------|
| #Volunteer                         | D0        | D14  | $\Delta(D14-D0)$ | $\Delta(D14-D0)\%$ |
| 1                                  | 37.7      | 42.5 | 4.8              | 12.7               |
| 2                                  | 36.9      | 33.7 | -3.3             | -8.8               |
| 3                                  | 40.3      | 45.5 | 5.2              | 12.9               |
| 4                                  | 44.3      | 48.7 | 4.4              | 9.9                |
| 5                                  | 39.5      | 43.0 | 3.5              | 8.8                |
| 6                                  | 37.0      | 34.3 | -2.7             | -7.3               |
| 7                                  | 41.6      | 34.1 | -7.5             | -18.0              |
| 8                                  | 31.4      | 39.5 | 8.1              | 25.8               |
| 9                                  | 32.2      | 36.2 | 4.0              | 12.4               |
| 10                                 | 40.6      | 38.2 | -2.4             | -5.9               |
| 11                                 | 43.0      | 49.6 | 6.6              | 15.3               |
| 12                                 | 40.7      | 33.8 | -6.9             | -17.0              |
| 13                                 | 41.3      | 37.4 | -3.9             | -9.4               |
| 14                                 | 47.2      | 49.5 | 2.3              | 4.9                |
| 15                                 | 39.7      | 42.8 | 3.1              | 7.8                |
| 16                                 | 41.2      | 42.9 | 1.7              | 4.1                |
| 17                                 | 40.0      | 41.9 | 1.9              | 4.8                |
| 18                                 | 41.9      | 43.8 | 1.9              | 4.5                |
| 19                                 | 42.6      | 45.1 | 2.5              | 5.9                |
| 20                                 | 43.0      | 45.6 | 2.6              | 6.0                |
| <b>Average</b>                     | 40.1      | 41.4 | 1.3              | 3.5                |
| <b>Std. Dev</b>                    | 3.7       | 5.3  | 4.3              | 11.2               |
| N. Volunteers                      | 20        | 20   | 20               |                    |
| <b>t-test</b>                      | 0.8986201 |      |                  |                    |
| Degrees of Freedom                 | 38        |      |                  |                    |
| <b>p</b>                           | 0.374514  |      |                  |                    |

c)

| COLLAGEN INDEX D0 - D28<br>Placebo |           |       |                  |                    |
|------------------------------------|-----------|-------|------------------|--------------------|
| #Volunteer                         | D0        | D28   | $\Delta(D28-D0)$ | $\Delta(D28-D0)\%$ |
| 1                                  | 37.7      | 44.1  | 6.4              | 17.0               |
| 2                                  | 36.9      | 35.4  | -1.5             | -4.0               |
| 3                                  | 40.3      | 40.9  | 0.6              | 1.5                |
| 4                                  | 44.3      | 36.9  | -7.4             | -16.7              |
| 5                                  | 39.5      | 41.6  | 2.1              | 5.4                |
| 6                                  | 37.0      | 28.6  | -8.4             | -22.7              |
| 7                                  | 41.6      | 30.7  | -10.9            | -26.2              |
| 8                                  | 31.4      | 31.7  | 0.3              | 1.0                |
| 9                                  | 32.2      | 30.9  | -1.3             | -4.0               |
| 10                                 | 40.6      | 29.5  | -11.1            | -27.3              |
| 11                                 | 43.0      | 46.7  | 3.7              | 8.6                |
| 12                                 | 40.7      | 32.6  | -8.1             | -19.9              |
| 13                                 | 41.3      | 37.0  | -4.3             | -10.4              |
| 14                                 | 47.2      | 31.4  | -15.8            | -33.5              |
| 15                                 | 39.7      | 39.50 | -0.2             | -0.5               |
| 16                                 | 41.2      | 37.80 | -3.4             | -8.3               |
| 17                                 | 40.0      | 34.40 | -5.6             | -14.0              |
| 18                                 | 41.9      | 38.50 | -3.4             | -8.1               |
| 19                                 | 42.6      | 39.30 | -3.3             | -7.7               |
| 20                                 | 43.0      | 38.40 | -4.6             | -10.7              |
| <b>Average</b>                     | 40.1      | 36.3  | -3.8             | <b>-9.0</b>        |
| <b>Std. Dev</b>                    | 3.7       | 5.0   | 5.4              | 12.9               |
| N. Volunteers                      | 20        | 20    | 20               |                    |
| <i>t-test</i>                      | 2.7215356 |       |                  |                    |
| Degrees of Freedom                 | 38        |       |                  |                    |
| <i>p</i>                           | 0.0097516 |       |                  |                    |



**Table S6.** T-zone wrinkles on volunteers treated with CsEx after a) 7, b) 14, and c) 28 days. T-zone wrinkles value for each volunteer and their variation are reported, along with average percentage variation value  $\pm$  SD.

| a) T-ZONE WRINKLES D0 - D7<br>CsEx |           |       |                 |                   |  |
|------------------------------------|-----------|-------|-----------------|-------------------|--|
| #Volunteer                         | D0        | D7    | $\Delta(D7-D0)$ | $\Delta(D7-D0)\%$ |  |
| 1                                  | 20.50     | 21.67 | 1.2             | 5.7               |  |
| 2                                  | 37.58     | 23.98 | -13.6           | -36.2             |  |
| 3                                  | 24.19     | 20.95 | -3.2            | -13.4             |  |
| 4                                  | 25.05     | 23.57 | -1.5            | -5.9              |  |
| 5                                  | 32.32     | 32.74 | 0.4             | 1.3               |  |
| 6                                  | 20.34     | 14.03 | -6.3            | -31.0             |  |
| 7                                  | 29.56     | 19.50 | -10.1           | -34.1             |  |
| 8                                  | 20.71     | 16.15 | -4.6            | -22.0             |  |
| 9                                  | 26.00     | 21.69 | -4.3            | -16.6             |  |
| 10                                 | 33.47     | 21.26 | -12.2           | -36.5             |  |
| 11                                 | 26.65     | 19.03 | -7.6            | -28.6             |  |
| 12                                 | 22.60     | 18.39 | -4.2            | -18.7             |  |
| 13                                 | 26.48     | 22.40 | -4.1            | -15.4             |  |
| 14                                 | 24.06     | 25.77 | 1.7             | 7.1               |  |
| 15                                 | 24.55     | 20.78 | -3.8            | -15.4             |  |
| 16                                 | 29.60     | 27.55 | -2.1            | -6.9              |  |
| 17                                 | 21.70     | 23.70 | 2.0             | 9.2               |  |
| 18                                 | 26.80     | 27.40 | 0.6             | 2.2               |  |
| 19                                 | 27.20     | 28.00 | 0.8             | 2.9               |  |
| 20                                 | 26.45     | 27.00 | 0.6             | 2.1               |  |
| Average                            | 26.29     | 22.78 | -3.5            | -12.5             |  |
| Std. Dev                           | 4.5       | 4.5   | 4.6             | 15.4              |  |
| N. Volunteers                      | 20        | 20    | 20              |                   |  |
| t-test                             | 2.4771067 |       |                 |                   |  |
| Degrees of Freedom                 | 38        |       |                 |                   |  |
| p                                  | 0.017809  |       |                 |                   |  |

| b) T-ZONE WRINKLES D0 - D14<br>CsEx |          |       |                  |                    |  |
|-------------------------------------|----------|-------|------------------|--------------------|--|
| #Volunteer                          | D0       | D14   | $\Delta(D14-D0)$ | $\Delta(D14-D0)\%$ |  |
| 1                                   | 20.50    | 20.56 | 0.1              | 0.3                |  |
| 2                                   | 37.58    | 24.23 | -13.4            | -35.5              |  |
| 3                                   | 24.19    | 17.78 | -6.4             | -26.5              |  |
| 4                                   | 25.05    | 24.10 | -0.9             | -3.8               |  |
| 5                                   | 32.32    | 19.46 | -12.9            | -39.8              |  |
| 6                                   | 20.34    | 13.49 | -6.8             | -33.7              |  |
| 7                                   | 29.56    | 27.13 | -2.4             | -8.2               |  |
| 8                                   | 20.71    | 15.04 | -5.7             | -27.4              |  |
| 9                                   | 26.00    | 25.01 | -1.0             | -3.8               |  |
| 10                                  | 33.47    | 25.15 | -8.3             | -24.9              |  |
| 11                                  | 26.65    | 19.19 | -7.5             | -28.0              |  |
| 12                                  | 22.60    | 19.75 | -2.9             | -12.6              |  |
| 13                                  | 26.48    | 24.51 | -2.0             | -7.5               |  |
| 14                                  | 24.06    | 14.51 | -9.5             | -39.7              |  |
| 15                                  | 24.55    | 20.35 | -4.2             | -17.1              |  |
| 16                                  | 29.60    | 23.55 | -6.1             | -20.4              |  |
| 17                                  | 21.70    | 22.75 | 1.1              | 4.8                |  |
| 18                                  | 26.80    | 17.40 | -9.4             | -35.1              |  |
| 19                                  | 27.20    | 24.39 | -2.8             | -10.3              |  |
| 20                                  | 26.45    | 23.50 | -3.0             | -11.2              |  |
| Average                             | 26.29    | 21.09 | -5.2             | -19.0              |  |
| Std. Dev                            | 4.5      | 3.9   | 4.1              | 13.9               |  |
| N. Volunteers                       | 20       | 20    | 20               |                    |  |
| t-test                              | 3.878287 |       |                  |                    |  |
| Degrees of Freedom                  | 38       |       |                  |                    |  |
| p                                   | 0.000405 |       |                  |                    |  |

c)

| T-ZONE WRINKLES D0 - D28<br>CsEx |           |       |                  |                    |
|----------------------------------|-----------|-------|------------------|--------------------|
| #Volunteer                       | D0        | D28   | $\Delta(D28-D0)$ | $\Delta(D28-D0)\%$ |
| 1                                | 20.50     | 13.40 | -7.1             | -34.6              |
| 2                                | 37.58     | 24.08 | -13.5            | -35.9              |
| 3                                | 24.19     | 14.22 | -10.0            | -41.2              |
| 4                                | 25.05     | 23.15 | -1.9             | -7.6               |
| 5                                | 32.32     | 24.59 | -7.7             | -23.9              |
| 6                                | 20.34     | 14.03 | -6.3             | -31.0              |
| 7                                | 29.56     | 15.85 | -13.7            | -46.4              |
| 8                                | 20.71     | 14.99 | -5.7             | -27.6              |
| 9                                | 26.00     | 19.38 | -6.6             | -25.5              |
| 10                               | 33.47     | 19.59 | -13.9            | -41.5              |
| 11                               | 26.65     | 11.37 | -15.3            | -57.4              |
| 12                               | 22.60     | 21.22 | -1.4             | -6.1               |
| 13                               | 26.48     | 24.62 | -1.9             | -7.0               |
| 14                               | 24.06     | 6.48  | -17.6            | -73.1              |
| 15                               | 24.55     | 23.10 | -1.5             | -5.9               |
| 16                               | 29.60     | 30.00 | 0.4              | 1.4                |
| 17                               | 21.70     | 17.00 | -4.7             | -21.7              |
| 18                               | 26.80     | 19.35 | -7.5             | -27.8              |
| 19                               | 27.20     | 21.60 | -5.6             | -20.6              |
| 20                               | 26.45     | 19.50 | -7.0             | -26.3              |
| <b>Average</b>                   | 26.29     | 18.88 | -7.4             | -28.0              |
| <b>Std. Dev</b>                  | 4.5       | 5.5   | 5.1              | 18.5               |
| N. Volunteers                    | 20        | 20    | 20               |                    |
| <i>t-test</i>                    | 4.6482833 |       |                  |                    |
| <i>Degrees of Freedom</i>        | 38        |       |                  |                    |
| <i>p</i>                         | 3.958E-05 |       |                  |                    |

**Table S7.** T-zone wrinkles on volunteers treated with placebo after a) 7, b) 14, and c) 28 days. T-zone wrinkles value for each volunteer and their variation are reported, along with average percentage variation value  $\pm$  SD.

| a) | T-ZONE WRINKLES D0 - D7<br>Placebo |           |       |                 |                   |
|----|------------------------------------|-----------|-------|-----------------|-------------------|
|    | #Volunteer                         | D0        | D7    | $\Delta(D7-D0)$ | $\Delta(D7-D0)\%$ |
|    | 1                                  | 32.02     | 39.06 | 7.0             | 22.0              |
|    | 2                                  | 19.34     | 11.56 | -7.8            | -40.2             |
|    | 3                                  | 31.00     | 34.60 | 3.6             | 11.6              |
|    | 4                                  | 34.63     | 32.69 | -1.9            | -5.6              |
|    | 5                                  | 36.86     | 34.49 | -2.4            | -6.4              |
|    | 6                                  | 29.68     | 22.40 | -7.3            | -24.5             |
|    | 7                                  | 32.81     | 27.33 | -5.5            | -16.7             |
|    | 8                                  | 28.57     | 24.79 | -3.8            | -13.3             |
|    | 9                                  | 33.93     | 33.46 | -0.5            | -1.4              |
|    | 10                                 | 34.78     | 39.69 | 4.9             | 14.1              |
|    | 11                                 | 28.98     | 49.78 | 20.8            | 71.8              |
|    | 12                                 | 31.41     | 55.78 | 24.4            | 77.6              |
|    | 13                                 | 30.00     | 30.00 | 0.0             | 0.0               |
|    | 14                                 | 33.74     | 71.74 | 38.0            | 112.6             |
|    | 15                                 | 28.80     | 32.80 | 4.0             | 13.9              |
|    | 16                                 | 30.55     | 30.95 | 0.4             | 1.3               |
|    | 17                                 | 27.60     | 30.55 | 3.0             | 10.7              |
|    | 18                                 | 26.80     | 30.80 | 4.0             | 14.9              |
|    | 19                                 | 32.25     | 40.60 | 8.4             | 25.9              |
|    | 20                                 | 30.95     | 37.77 | 6.8             | 22.0              |
|    | <b>Average</b>                     | 30.74     | 35.54 | 4.8             | 14.5              |
|    | <b>Std. Dev</b>                    | 3.7       | 12.6  | 11.3            | 36.2              |
|    | N. Volunteers                      | 20        | 20    | 20              |                   |
|    | <i>t-test</i>                      | 1.6308293 |       |                 |                   |
|    | Degrees of Freedom                 | 38        |       |                 |                   |
|    | <i>p</i>                           | 0.1111883 |       |                 |                   |

| b) | T-ZONE WRINKLES D0 - D14<br>Placebo |          |       |                  |                    |
|----|-------------------------------------|----------|-------|------------------|--------------------|
|    | #Volunteer                          | D0       | D14   | $\Delta(D14-D0)$ | $\Delta(D14-D0)\%$ |
|    | 1                                   | 32.02    | 36.60 | 4.6              | 14.3               |
|    | 2                                   | 19.34    | 18.40 | -0.9             | -4.8               |
|    | 3                                   | 31.00    | 28.70 | -2.3             | -7.4               |
|    | 4                                   | 34.63    | 30.09 | -4.5             | -13.1              |
|    | 5                                   | 36.86    | 38.98 | 2.1              | 5.7                |
|    | 6                                   | 29.68    | 23.36 | -6.3             | -21.3              |
|    | 7                                   | 32.81    | 25.86 | -7.0             | -21.2              |
|    | 8                                   | 28.57    | 24.91 | -3.7             | -12.8              |
|    | 9                                   | 33.93    | 38.85 | 4.9              | 14.5               |
|    | 10                                  | 34.78    | 30.56 | -4.2             | -12.1              |
|    | 11                                  | 28.98    | 26.47 | -2.5             | -8.6               |
|    | 12                                  | 31.41    | 31.42 | 0.0              | 0.0                |
|    | 13                                  | 40.00    | 40.00 | 0.0              | 0.0                |
|    | 14                                  | 33.74    | 30.03 | -3.7             | -11.0              |
|    | 15                                  | 28.80    | 24.35 | -4.5             | -15.5              |
|    | 16                                  | 30.55    | 26.80 | -3.8             | -12.3              |
|    | 17                                  | 27.60    | 30.70 | 3.1              | 11.2               |
|    | 18                                  | 36.80    | 42.78 | 6.0              | 16.3               |
|    | 19                                  | 32.25    | 29.55 | -2.7             | -8.4               |
|    | 20                                  | 30.95    | 26.70 | -4.3             | -13.7              |
|    | <b>Average</b>                      | 31.74    | 30.25 | -1.5             | -5.0               |
|    | <b>Std. Dev</b>                     | 4.3      | 6.3   | 3.8              | 11.8               |
|    | N. Volunteers                       | 20       | 20    | 20               |                    |
|    | <i>t-test</i>                       | 0.866672 |       |                  |                    |
|    | Degrees of Freedom                  | 38       |       |                  |                    |
|    | <i>p</i>                            | 0.391561 |       |                  |                    |

c)

| T-ZONE WRINKLES D0 - D28  |            |       |                  |                    |
|---------------------------|------------|-------|------------------|--------------------|
| NC69 - CORDYS REVITAGEN   |            |       |                  |                    |
| Placebo                   |            |       |                  |                    |
| #Volunteer                | D0         | D28   | $\Delta(D28-D0)$ | $\Delta(D28-D0)\%$ |
| 1                         | 32.02      | 36.59 | 4.6              | 14.3               |
| 2                         | 19.34      | 10.62 | -8.7             | -45.1              |
| 3                         | 31.00      | 28.00 | -3.0             | -9.7               |
| 4                         | 34.63      | 35.21 | 0.6              | 1.7                |
| 5                         | 36.86      | 58.40 | 21.5             | 58.4               |
| 6                         | 29.68      | 17.36 | -12.3            | -41.5              |
| 7                         | 32.81      | 21.55 | -11.3            | -34.3              |
| 8                         | 28.57      | 13.54 | -15.0            | -52.6              |
| 9                         | 33.93      | 38.28 | 4.3              | 12.8               |
| 10                        | 34.78      | 25.78 | -9.0             | -25.9              |
| 11                        | 28.98      | 29.32 | 0.3              | 1.2                |
| 12                        | 31.41      | 42.90 | 11.5             | 36.6               |
| 13                        | 40.00      | 40.00 | 0.0              | 0.0                |
| 14                        | 33.74      | 64.00 | 30.3             | 89.7               |
| 15                        | 28.80      | 31.00 | 2.2              | 7.6                |
| 16                        | 30.55      | 32.00 | 1.5              | 4.7                |
| 17                        | 27.60      | 27.20 | -0.4             | -1.4               |
| 18                        | 36.80      | 36.00 | -0.8             | -2.2               |
| 19                        | 32.25      | 35.50 | 3.3              | 10.1               |
| 20                        | 30.95      | 32.50 | 1.6              | 5.0                |
| <b>Average</b>            | 31.74      | 32.79 | 1.1              | 1.5                |
| <b>Std. Dev</b>           | 4.3        | 13.0  | 10.8             | 33.9               |
| N. Volunteers             | 20         | 20    | 20               |                    |
| <i>t-test</i>             | 0.34421241 |       |                  |                    |
| <i>Degrees of Freedom</i> | 38         |       |                  |                    |
| <i>p</i>                  | 0.73258417 |       |                  |                    |

**Table S8.** Anova test on CsEx skin energy value vs placebo at D7, D14, and D28.

|                    | SKIN ENERGY D7 |             |  | SKIN ENERGY D14 |             |  | SKIN ENERGY D28 |             |
|--------------------|----------------|-------------|--|-----------------|-------------|--|-----------------|-------------|
|                    | CsEx           | Placebo     |  | CsEx            | Placebo     |  | CsEx            | Placebo     |
|                    | -21.62         | 47.88       |  | 12.89           | 21.21       |  | 37.84           | 21.21       |
|                    | 9.13           | 53.80       |  | 22.93           | 14.13       |  | 21.99           | 75.14       |
|                    | 26.80          | 5.56        |  | 33.57           | 20.83       |  | 81.56           | 11.11       |
|                    | -8.36          | 4.09        |  | 34.77           | 32.35       |  | 42.86           | 60.88       |
|                    | 14.08          | -9.47       |  | 55.75           | 30.26       |  | 58.05           | 3.68        |
|                    | -4.31          | -2.58       |  | 6.32            | 20.00       |  | 29.02           | 20.00       |
|                    | 0.00           | 2.94        |  | 10.53           | 11.76       |  | 78.95           | 20.59       |
|                    | 3.00           | 4.00        |  | 10.81           | 15.79       |  | 38.08           | 31.05       |
|                    | 5.26           | 8.89        |  | 24.47           | 33.06       |  | 18.42           | 30.00       |
|                    | 7.35           | -12.60      |  | 12.06           | 19.00       |  | 118.50          | -18.00      |
|                    | 30.56          | 3.42        |  | 5.83            | -6.80       |  | 43.78           | -6.84       |
|                    | 27.78          | -2.78       |  | 16.11           | -5.56       |  | 75.00           | 0.00        |
|                    | 27.78          | -13.51      |  | 27.78           | -2.70       |  | 27.78           | -2.70       |
|                    | 7.89           | 0.00        |  | 31.58           | 20.90       |  | 57.89           | 20.90       |
|                    | 42.86          | -1.43       |  | 34.29           | 14.29       |  | 51.43           | 28.57       |
|                    | 21.21          | -10.26      |  | 34.85           | 12.82       |  | 51.52           | 7.69        |
|                    | 42.03          | -5.00       |  | 42.03           | 25.00       |  | 24.64           | 12.50       |
|                    | 34.21          | 2.78        |  | 34.21           | 16.67       |  | 31.58           | 33.33       |
|                    | 32.50          | -2.86       |  | 17.50           | 14.29       |  | 22.50           | 14.29       |
|                    | 41.18          | -13.51      |  | 41.18           | 32.43       |  | 52.94           | -18.92      |
| Group average      | 16.966317      | 2.96782061  |  | 25.47288307     | 16.98672529 |  | 48.21536401     | 17.22424274 |
| Total average      | 9.967068803    |             |  | 21.22980418     |             |  | 32.71980338     |             |
| Number of data     | 20             |             |  | 20              |             |  | 20              |             |
| SSB                | 1959.579011    |             |  | 720.1487398     |             |  | 9604.495977     |             |
| SSx                | 6403.788352    | 5950.292432 |  | 3561.556509     | 2565.019462 |  | 12061.78105     | 10213.37969 |
| SSW                | 12354.08078    |             |  | 6126.575971     |             |  | 22275.16074     |             |
| dfB                | 1              |             |  | 1               |             |  | 1               |             |
| dfS                | 38             |             |  | 38              |             |  | 38              |             |
| S^2B               | 1959.579011    |             |  | 720.1487398     |             |  | 9604.495977     |             |
| S^2W               | 325.1073891    |             |  | 161.2256834     |             |  | 586.1884405     |             |
| F                  | 6.027482231    |             |  | 4.466712278     |             |  | 16.38465605     |             |
| Significance level | 0.05           |             |  | 0.05            |             |  | 0.05            |             |
| pvalue             | 0.018774072    |             |  | 0.041184105     |             |  | 0.000244989     |             |
|                    | \$             |             |  | \$              |             |  | \$\$\$          |             |

**Table S9.** Anova test on CsEx collagen index value vs placebo at D7, D14, and D28.

|                    | COLLAGEN INDEX D7 |              |  | COLLAGEN INDEX D14 |             |  | COLLAGEN INDEX D28 |              |
|--------------------|-------------------|--------------|--|--------------------|-------------|--|--------------------|--------------|
|                    | CsEx              | Placebo      |  | CsEx               | Placebo     |  | CsEx               | Placebo      |
|                    | 1.32              | 10.88        |  | 1.89               | 12.73       |  | -9.10              | 16.98        |
|                    | 2.38              | -18.51       |  | 3.09               | -8.81       |  | -25.42             | -4.00        |
|                    | -9.31             | 1.49         |  | 13.09              | 12.90       |  | 16.61              | 1.49         |
|                    | 6.95              | 3.16         |  | 2.88               | 9.93        |  | 10.55              | -16.70       |
|                    | 8.56              | 18.99        |  | 14.23              | 8.80        |  | 11.08              | 5.40         |
|                    | 6.71              | -30.81       |  | 12.06              | -7.30       |  | 19.58              | -22.70       |
|                    | 0.00              | -25.96       |  | 2.85               | -18.03      |  | 1.30               | -26.20       |
|                    | 7.19              | 4.78         |  | 24.68              | 25.80       |  | 3.79               | 0.96         |
|                    | -7.16             | -15.22       |  | 9.79               | 12.42       |  | 2.70               | -4.04        |
|                    | -7.41             | -12.56       |  | 0.60               | -5.91       |  | 18.56              | -27.34       |
|                    | -6.62             | -1.63        |  | 6.18               | 15.35       |  | 5.23               | 8.60         |
|                    | -2.52             | -12.53       |  | 17.20              | -16.95      |  | 20.09              | -19.90       |
|                    | 1.53              | 16.95        |  | 1.10               | -9.44       |  | 11.57              | -10.41       |
|                    | 3.15              | 1.27         |  | -5.00              | 4.87        |  | -1.90              | -33.47       |
|                    | 8.31              | 0.50         |  | 12.85              | 7.81        |  | 30.98              | -0.50        |
|                    | 4.71              | 0.49         |  | 18.11              | 4.13        |  | 24.32              | -8.25        |
|                    | 6.19              | 3.75         |  | 16.09              | 4.75        |  | 14.28              | -14.00       |
|                    | 5.32              | -8.11        |  | 18.48              | 4.53        |  | 21.90              | -8.11        |
|                    | 6.89              | 2.35         |  | 15.05              | 5.87        |  | 17.86              | -7.75        |
|                    | -5.71             | 0.00         |  | 14.29              | 6.05        |  | 16.67              | -10.70       |
| Group average      | 1.524249          | -3.036907996 |  | 9.97549074         | 3.475041041 |  | 10.53164405        | -9.033194638 |
| Total average      | -0.756329481      |              |  | 6.72526589         |             |  | 0.749224707        |              |
| Number of data     | 20                |              |  | 20                 |             |  | 20                 |              |
| SSB                | 208.0415346       |              |  | 422.5584629        |             |  | 3827.82913         |              |
| SSx                | 672.5767283       | 3219.097792  |  | 1148.258876        | 2401.780037 |  | 3171.317918        | 3152.980914  |
| SSW                | 3891.67452        |              |  | 3550.038913        |             |  | 6324.298832        |              |
| dfB                | 1                 |              |  | 1                  |             |  | 1                  |              |
| dfS                | 38                |              |  | 38                 |             |  | 38                 |              |
| S^2B               | 208.0415346       |              |  | 422.5584629        |             |  | 3827.82913         |              |
| S^2W               | 102.4124874       |              |  | 93.42207666        |             |  | 166.4289166        |              |
| F                  | 2.031407887       |              |  | 4.523111432        |             |  | 22.99978398        |              |
| Significance level | 0.05              |              |  | 0.05               |             |  | 0.05               |              |
| pvalue             | 0.162240463       |              |  | 0.039992326        |             |  | 2.50723E-05        |              |
|                    |                   |              |  | \$                 |             |  | \$\$\$             |              |

**Table S10.** Anova test on CsEx T-zone wrinkles value vs placebo at D7, D14, and D28.

|                    | T-ZONE WRINKLES D7 |             | T-ZONEWRINKLES D14 |              | T-ZONE WRINKLES D28 |             |
|--------------------|--------------------|-------------|--------------------|--------------|---------------------|-------------|
|                    | CsEx               | Placebo     | CsEx               | Placebo      | CsEx                | Placebo     |
|                    | 5.68               | 21.99       | 0.30               | 14.30        | -34.62              | 14.27       |
|                    | -36.46             | -40.20      | -35.52             | -4.84        | -35.93              | -45.07      |
|                    | -15.88             | 11.61       | -26.51             | -7.42        | -41.22              | -9.68       |
|                    | -7.90              | -5.60       | -3.78              | -13.11       | -7.59               | 1.68        |
|                    | 1.30               | -6.44       | -39.81             | 5.75         | -23.93              | 58.45       |
|                    | -31.03             | -24.54      | -33.66             | -21.32       | -31.03              | -41.51      |
|                    | -34.06             | -16.70      | -8.23              | -21.20       | -46.40              | -34.32      |
|                    | -22.00             | -13.26      | -27.40             | -12.83       | -27.61              | -52.62      |
|                    | -16.56             | -1.40       | -3.81              | 14.49        | -25.47              | 12.80       |
|                    | -36.48             | 14.12       | -24.86             | -12.15       | -41.47              | -25.89      |
|                    | -28.61             | 71.80       | -28.00             | -8.63        | -57.35              | 1.19        |
|                    | -18.66             | 77.58       | -12.62             | 0.05         | -6.10               | 36.57       |
|                    | -15.42             | 0.00        | -7.45              | 0.00         | -7.03               | 0.00        |
|                    | 7.12               | 112.60      | -39.67             | -11.00       | -73.07              | 89.69       |
|                    | -15.36             | 13.89       | -17.11             | -15.45       | -5.91               | 7.64        |
|                    | -6.93              | 1.31        | -20.44             | -12.27       | 1.35                | 4.75        |
|                    | 9.22               | 10.69       | 4.84               | 11.23        | -21.66              | -1.45       |
|                    | 2.24               | 14.93       | -35.07             | 16.25        | -27.05              | -2.17       |
|                    | 3.49               | 25.89       | -10.33             | -8.37        | -19.85              | 10.08       |
|                    | 2.46               | 22.04       | -11.15             | -13.73       | -25.90              | 5.01        |
| Group average      | -12.690967         | 14.51403166 | -19.01460344       | -5.013389202 | -27.89157271        | 1.470117335 |
| Total average      | 0.911532556        |             | -12.01399632       |              | -13.21072769        |             |
| Number of data     | 20                 |             | 20                 |              | 20                  |             |
| SSB                | 7401.11927         |             | 1960.340001        |              | 8621.088421         |             |
| SSx                | 4514.437736        | 24892.82987 | 3684.54762         | 2644.899453  | 6523.881252         | 21804.8603  |
| SSW                | 29407.26761        |             | 6329.447073        |              | 28328.74155         |             |
| dfB                | 1                  |             | 1                  |              | 1                   |             |
| dfS                | 38                 |             | 38                 |              | 38                  |             |
| S^2B               | 7401.11927         |             | 1960.340001        |              | 8621.088421         |             |
| S^2W               | 773.8754633        |             | 166.5643967        |              | 745.4931987         |             |
| F                  | 9.563708401        |             | 11.76926186        |              | 11.56427508         |             |
| Significance level | 0.05               |             | 0.05               |              | 0.05                |             |
| pvalue             | 0.003709136        |             | 0.001465214        |              | 0.001593728         |             |
|                    | \$\$               |             | \$\$               |              | \$\$                |             |
